# Supplementary material for: Lignin-derivable alternatives to petroleum-derived non-isocyanate polyurethane thermosets with enhanced toughness
Source: Royal Society of Chemistry journal article supplement (doi:10.1039/d2ma00895e), 2022-11-30
Supplement: d2ma00895e1.pdf [file d2ma00895e1.pdf]

SVM-JSM-THE-LTJK\_SI

**Supporting Information (SI)**  
**Lignin-derivable alternatives to petroleum-derived non-isocyanate  
polyurethane thermosets with enhanced toughness**

Sampanna V. Mhatre,<sup>a</sup> Jignesh S. Mahajan,<sup>a</sup> Thomas H. Epps, III,<sup>abc\*</sup> and LaShanda T. J. Korley<sup>abc\*</sup>

<sup>a</sup>Department of Materials Science and Engineering, University of Delaware, Newark, Delaware 19716, USA

<sup>b</sup>Department of Chemical and Biomolecular Engineering, University of Delaware, Newark, Delaware 19716, USA

<sup>c</sup>Center for Research in Soft matter and Polymers (CRiSP), University of Delaware, Newark, Delaware 19716, USA

\*Corresponding authors:

thepps@udel.edu

lkorley@udel.edu

**Proton ( $^1\text{H}$ ) Nuclear Magnetic Resonance (NMR) spectra for bisguaiacols in deuterated dimethyl sulfoxide ( $\text{DMSO}-d_6$ )**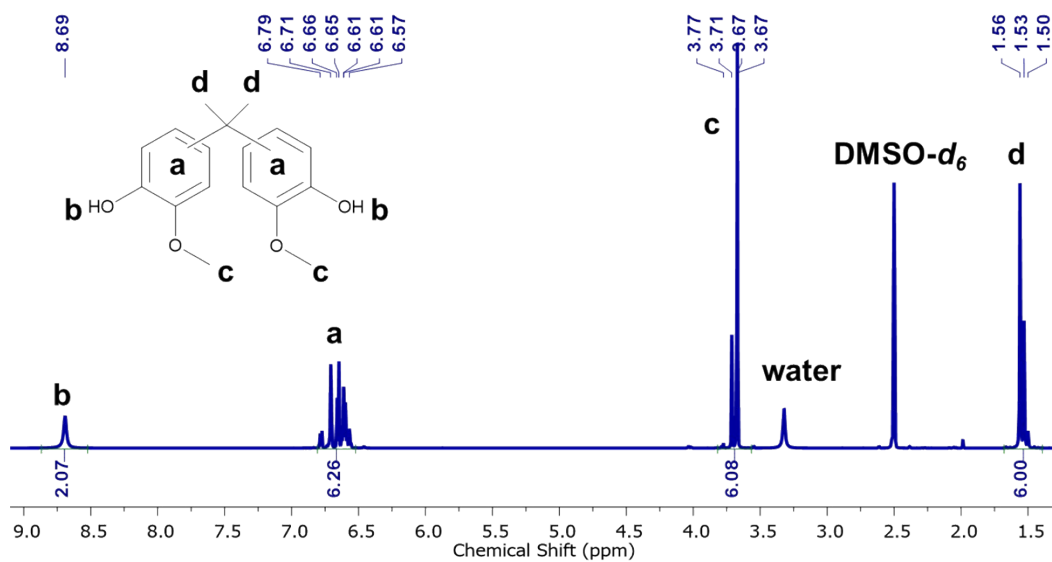**Figure S1.**  $^1\text{H}$  NMR spectrum of bisguaiacol A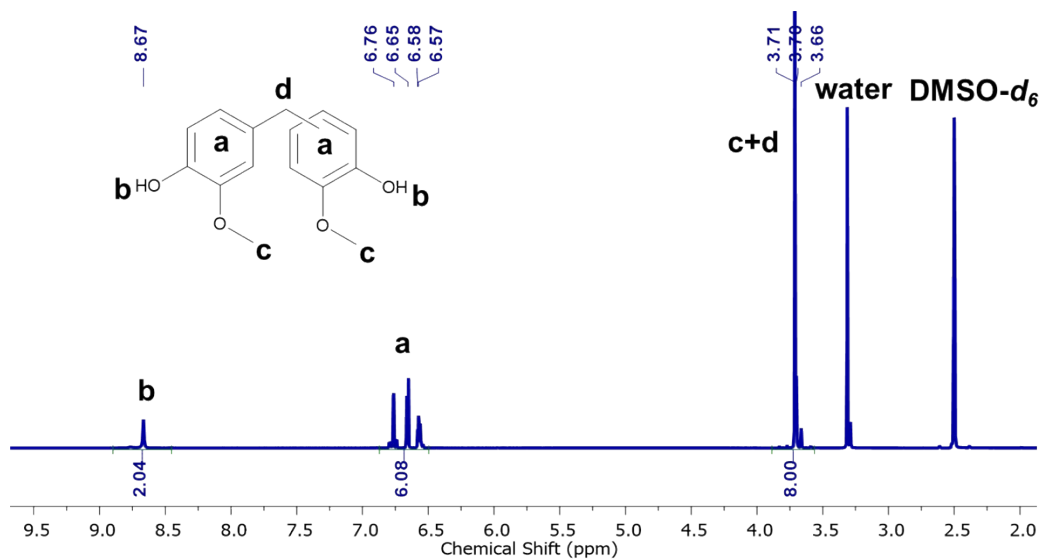**Figure S2.**  $^1\text{H}$  NMR spectrum of bisguaiacol F

**$^1\text{H}$  NMR spectra for diglycidyl ethers in  $\text{DMSO}-d_6$** 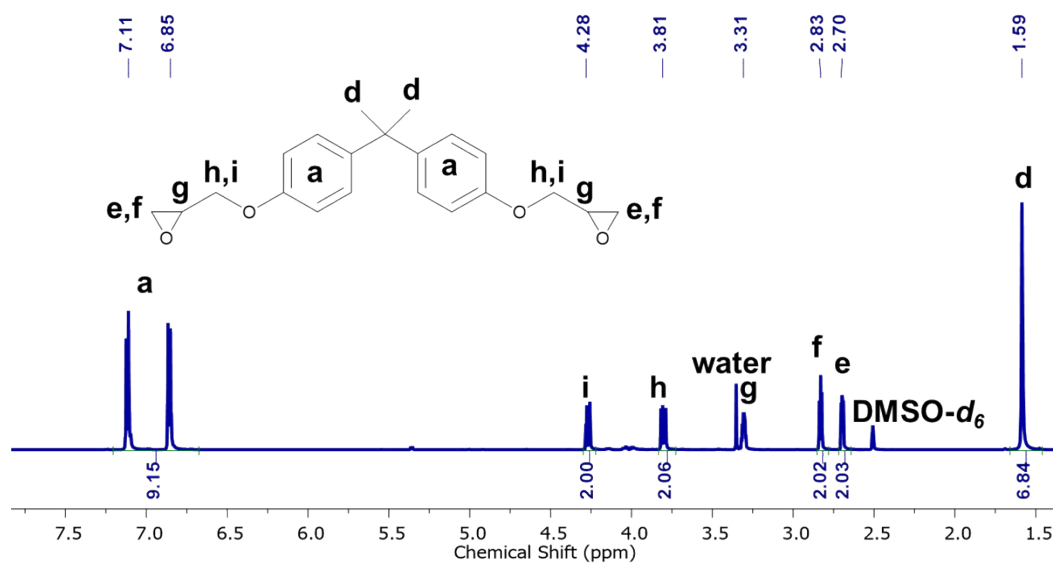**Figure S3.**  $^1\text{H}$  NMR spectrum of bisphenol A diglycidyl ether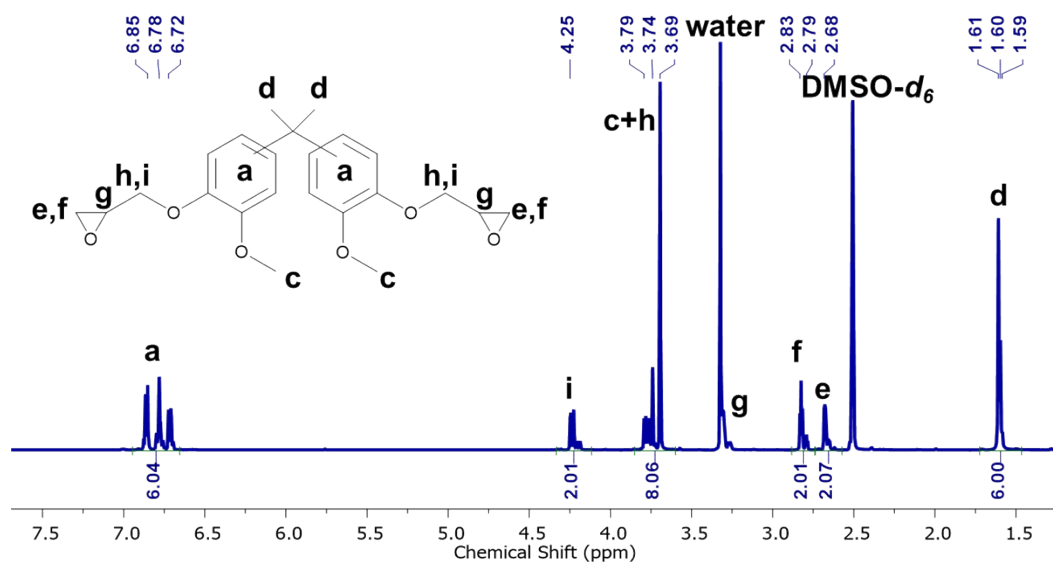**Figure S4.**  $^1\text{H}$  NMR spectrum of bisguaiacol A diglycidyl ether

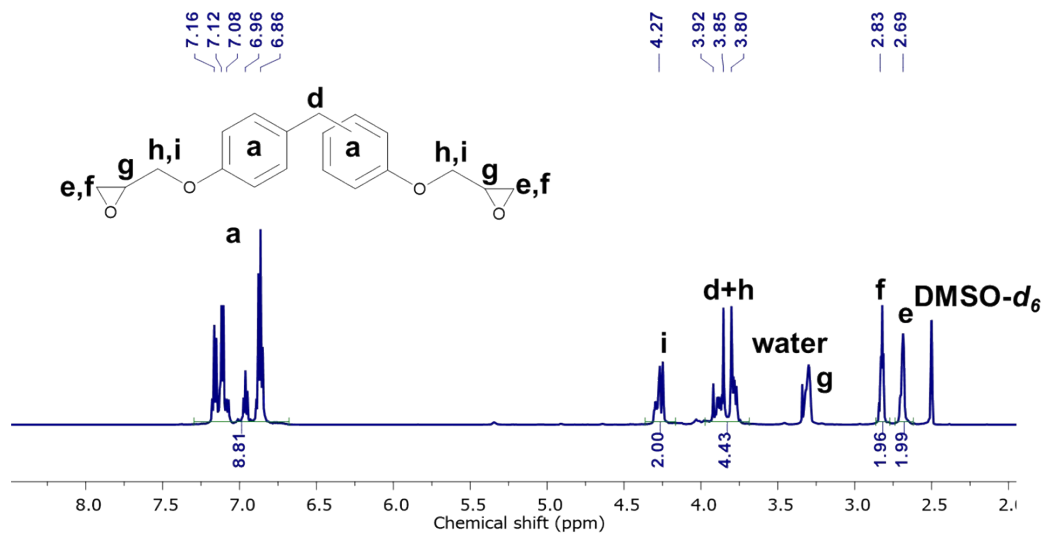

Figure S5. <sup>1</sup>H NMR spectrum of bisphenol F diglycidyl ether

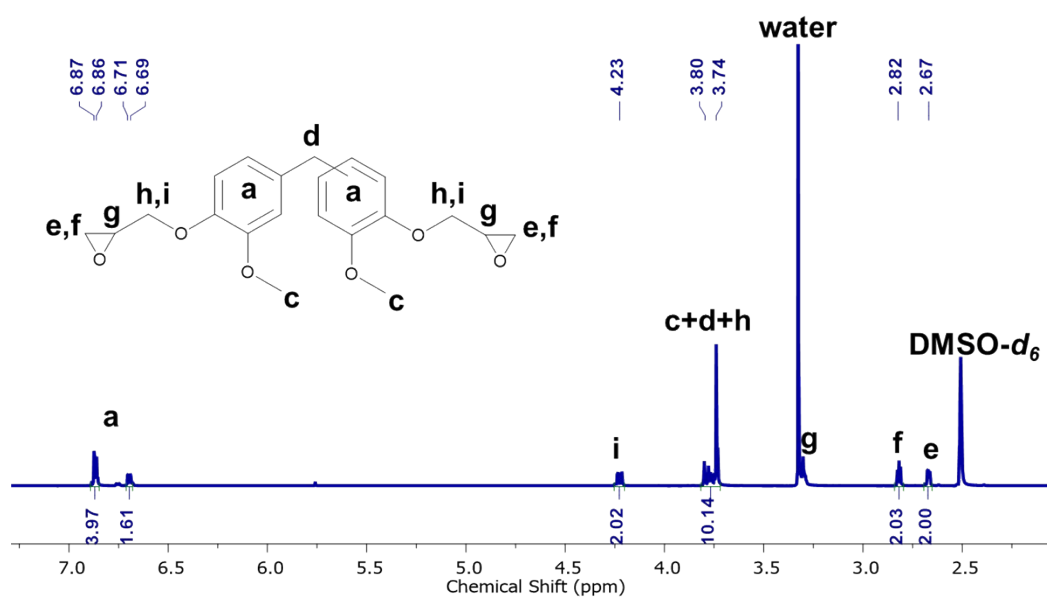

Figure S6. <sup>1</sup>H NMR spectrum of bisguaiacol F diglycidyl ether

**$^1\text{H}$  NMR spectra for cyclic carbonates in  $\text{DMSO-}d_6$** 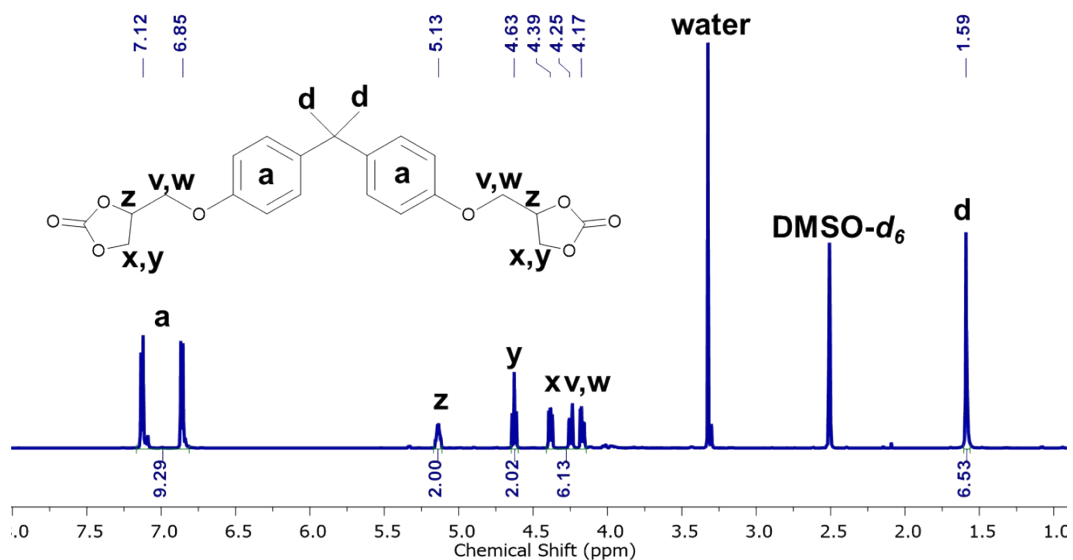**Figure S7.**  $^1\text{H}$  NMR spectrum of bisphenol A cyclic carbonate (BPACC)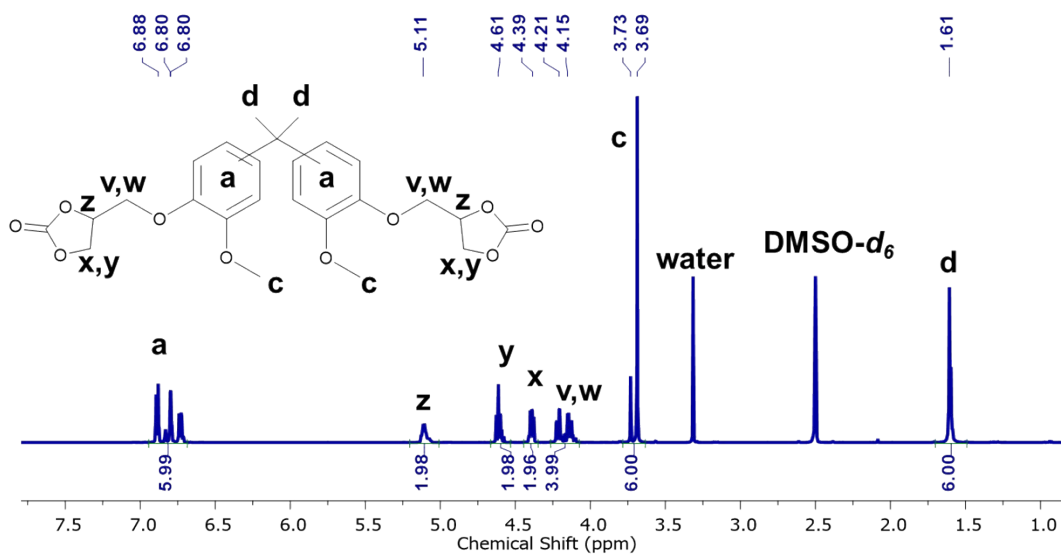**Figure S8.**  $^1\text{H}$  NMR spectrum of bisguaiacol A cyclic carbonate (BGACC)

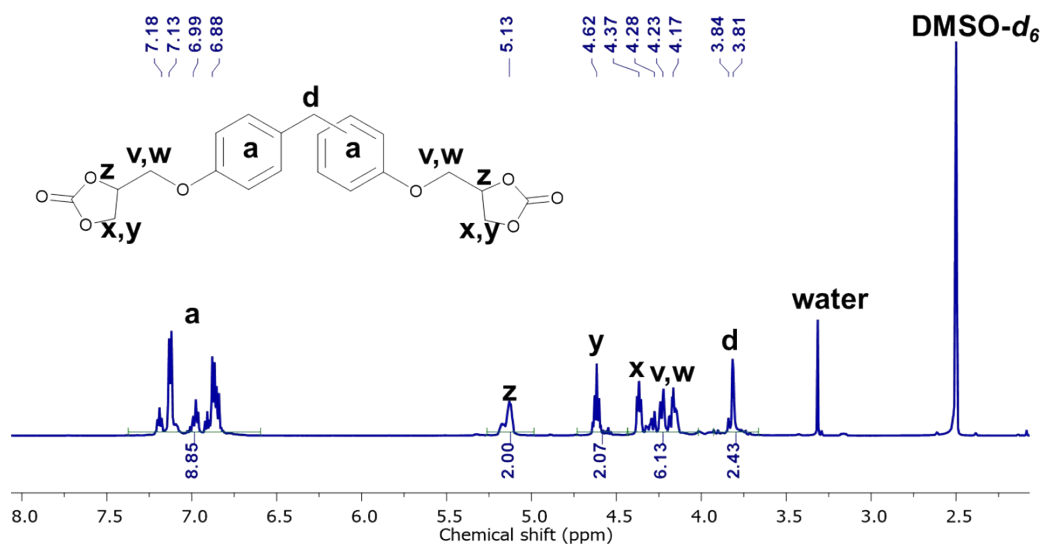

Figure S9.  $^1\text{H}$  NMR spectrum of bisphenol F cyclic carbonate (BPFCC)

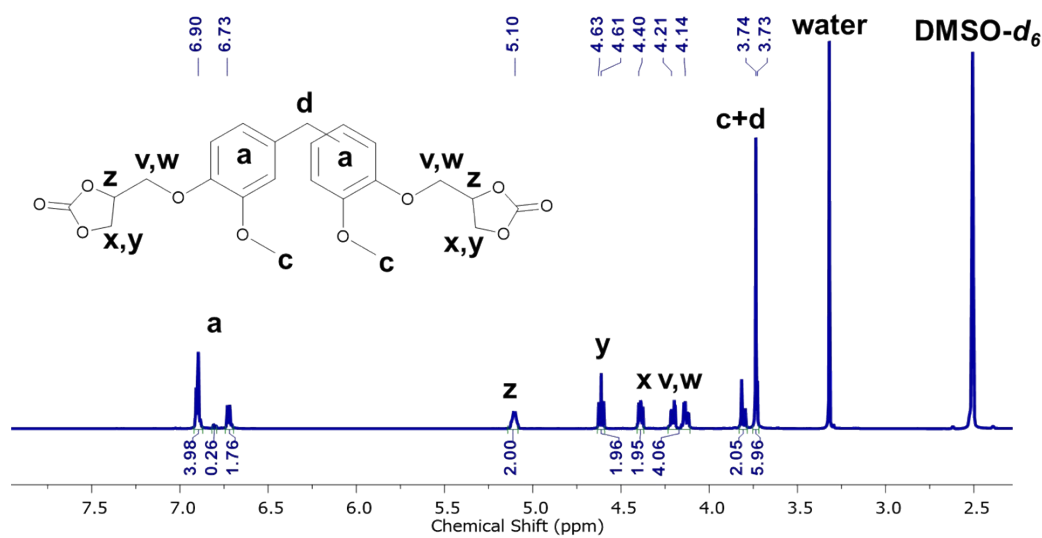

Figure S10.  $^1\text{H}$  NMR spectrum of bisguaiacol F cyclic carbonate (BGFCC)

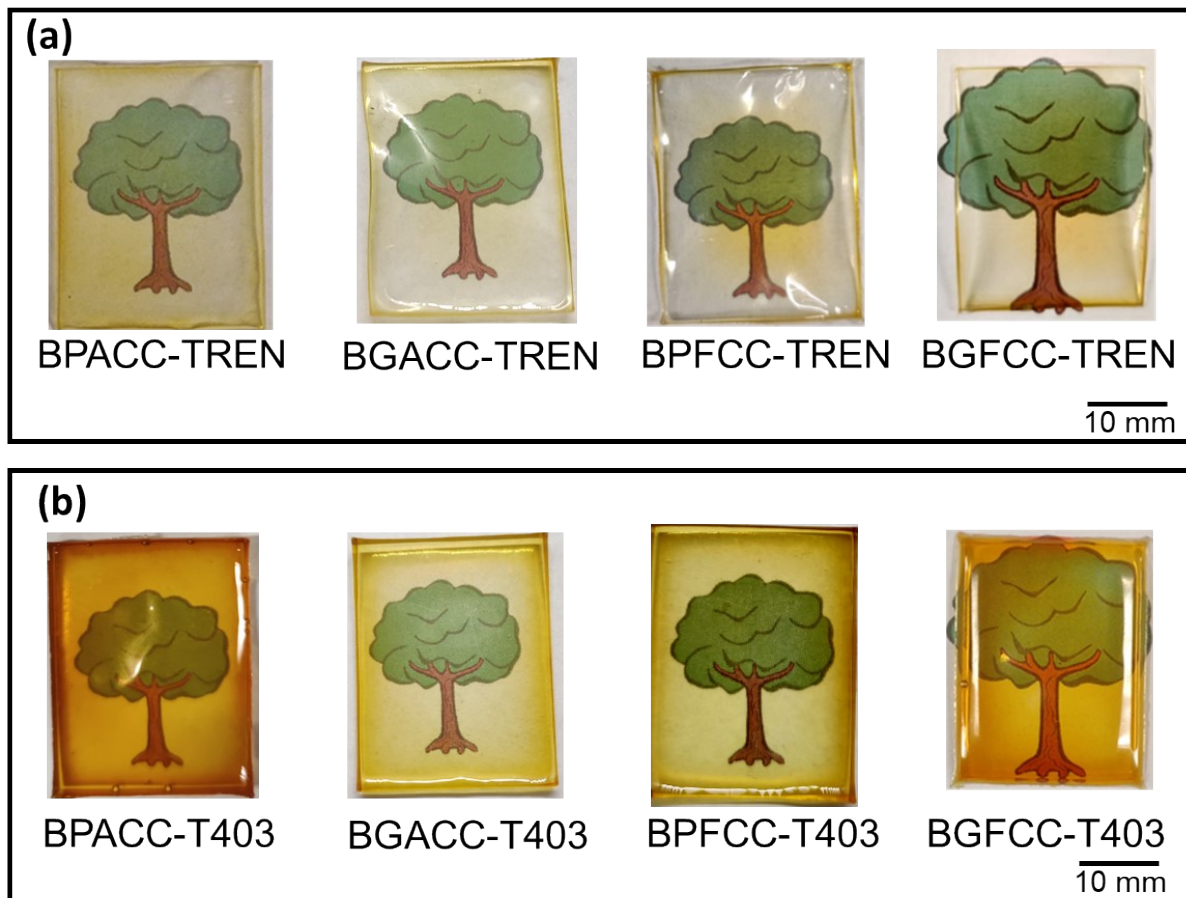

**Figure S11.** Photographs of non-isocyanate polyurethane (NIPU) networks, (a) crosslinked by tris(2-aminoethyl) amine (TREN) and (b) crosslinked by JEFFAMINE® T-403 (T403). The NIPUs were formed by the reaction of bifunctional cyclic carbonates and trifunctional amines dissolved in *N, N*-dimethylformamide. The reaction mixtures were cured in air at 60 °C for 2 h, then at 80 °C for 2 h, followed by 100 °C for 20 h, and subsequently postcured under vacuum at 100 °C for 48 h.

## Fourier transform infrared (FTIR) spectra for NIPU networks

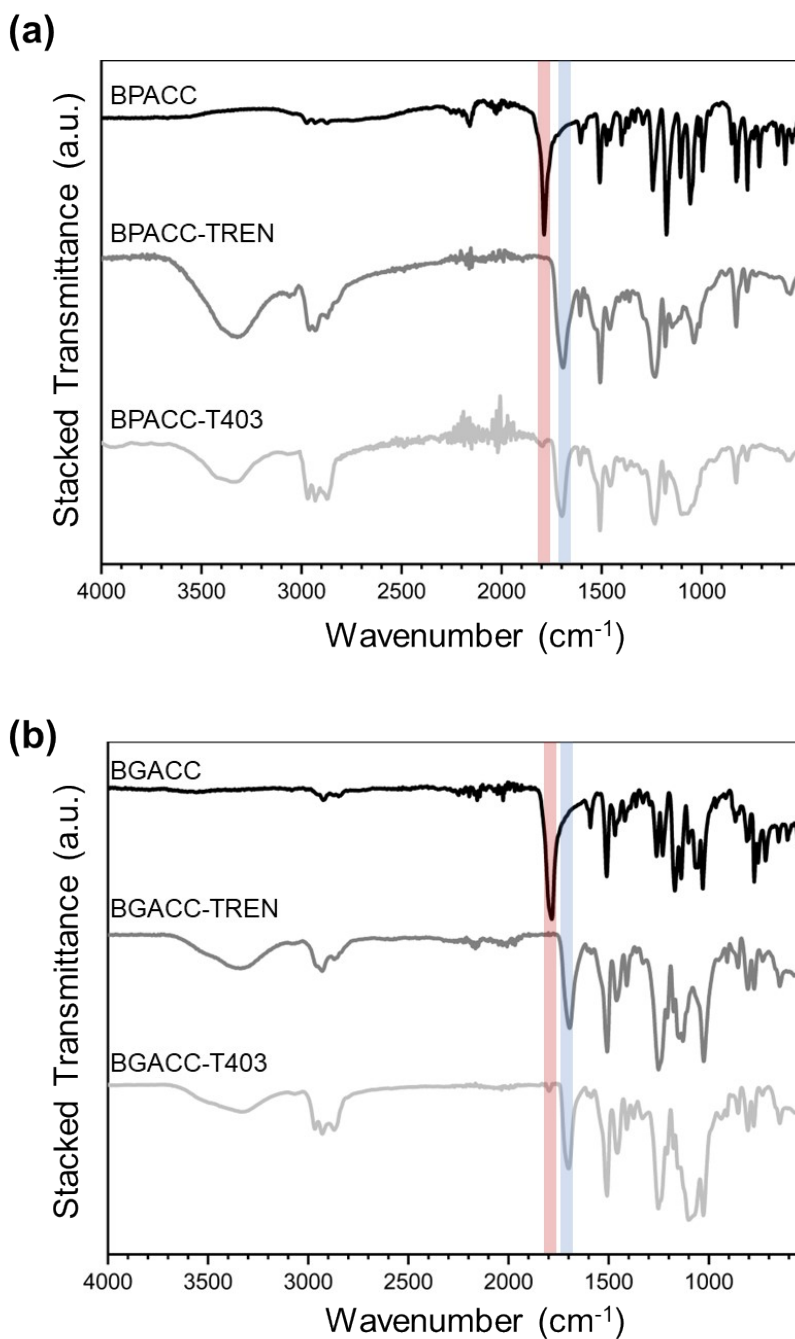

**Figure S12.** Stacked FTIR spectra of (a) BPACC, BPACC-TREN, and BPACC-T403, and (b) BGACC, BGACC-TREN, and BGACC-T403. The conversion was probed qualitatively by the disappearance of the cyclic carbonate carbonyl stretching band at  $\sim 1790\text{ cm}^{-1}$  (highlighted in red), the appearance of the urethane carbonyl stretching band at  $\sim 1700\text{ cm}^{-1}$  (highlighted in blue), and the appearance of the hydroxyl stretching band at  $\sim 3500\text{--}3300\text{ cm}^{-1}$ . Curves are shifted vertically for clarity.



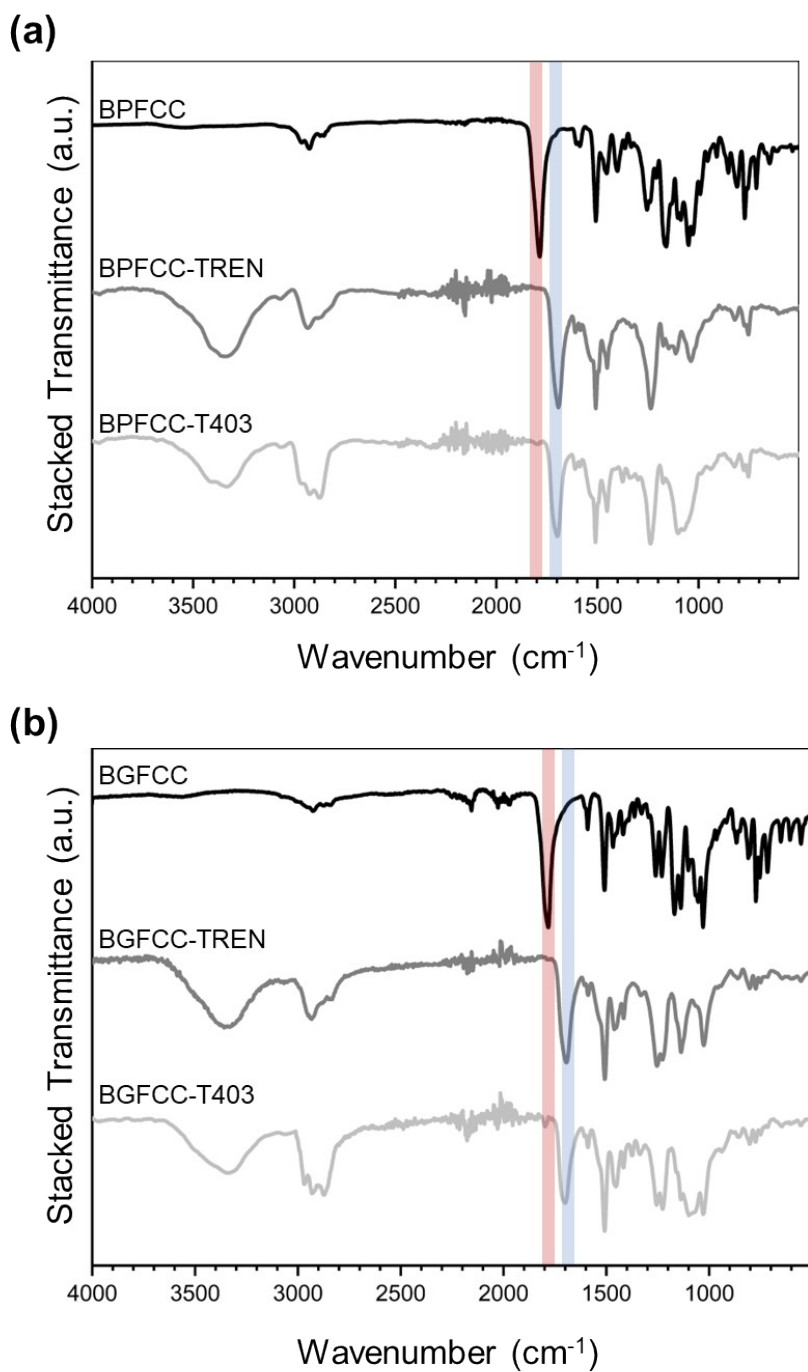

**Figure S13.** Stacked FTIR spectra of (a) BPFCC, BPFCC-TREN, and BPFCC-T403, and (b) BGFCC, BGFCC-TREN, and BGFCC-T403. The conversion was probed qualitatively by the disappearance of the cyclic carbonate carbonyl stretching band at  $\sim 1790\text{ cm}^{-1}$  (highlighted in red), the appearance of the urethane carbonyl stretching band at  $\sim 1700\text{ cm}^{-1}$  (highlighted in blue), and the appearance of the hydroxyl stretching band at  $\sim 3500\text{--}3300\text{ cm}^{-1}$ . Curves are shifted vertically for clarity.

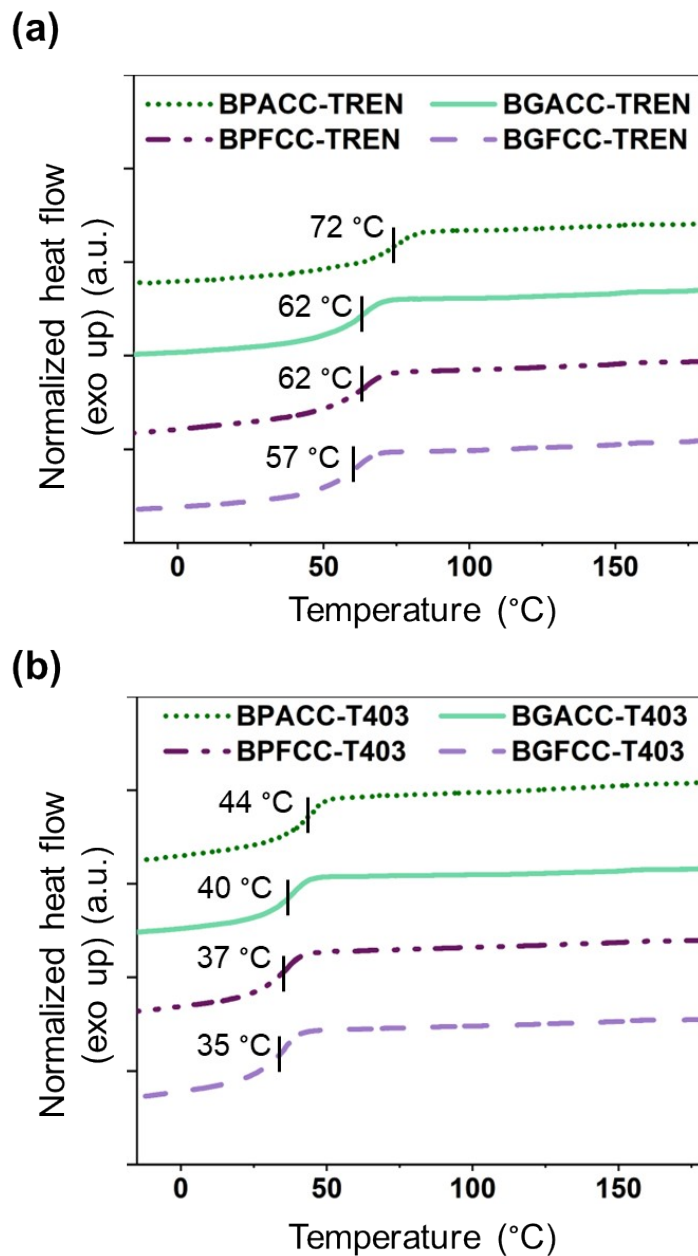

**Figure S14.** Representative differential scanning calorimetry (DSC) first cooling traces of (a) TREN-based and (b) T403-based NIPU networks (10 °C/min under an N<sub>2</sub> atmosphere). Curves are shifted vertically for clarity with glass transition temperature ( $T_g$ ) values marked on the respective curves. Each tick mark on the y-axis represents a 0.2 W/g increment.

**Table S1.**  $T_g$  and excess enthalpy values of NIPU networks from DSC data

| Sample     | Excess enthalpy (J/g) <sup>a,b</sup> | $T_g$ (°C) <sup>b,c</sup> |
|------------|--------------------------------------|---------------------------|
| BPACC-TREN | $0.52 \pm 0.15$                      | $72 \pm 0.4$              |
| BGACC-TREN | $0.44 \pm 0.07$                      | $62 \pm 0.2$              |
| BPFCC-TREN | $0.46 \pm 0.15$                      | $62 \pm 0.4$              |
| BGFCC-TREN | $0.50 \pm 0.12$                      | $57 \pm 1.8$              |
| BPACC-T403 | $0.52 \pm 0.13$                      | $42 \pm 1.7$              |
| BGACC-T403 | $0.52 \pm 0.03$                      | $40 \pm 0.6$              |
| BPFCC-T403 | $0.44 \pm 0.07$                      | $37 \pm 0.5$              |
| BGFCC-T403 | $0.54 \pm 0.01$                      | $35 \pm 0.6$              |

<sup>a</sup>Determined from the magnitude of the area under the peaks associated with physical aging from the second heating traces of DSC at a heating rate of 10 °C/min in an N<sub>2</sub> atmosphere.

<sup>b</sup>The reported values are the average of three repeats with errors representing the standard deviation.

<sup>c</sup>Determined from the first cooling trace of DSC at a cooling rate of 10 °C/min in an N<sub>2</sub> atmosphere.

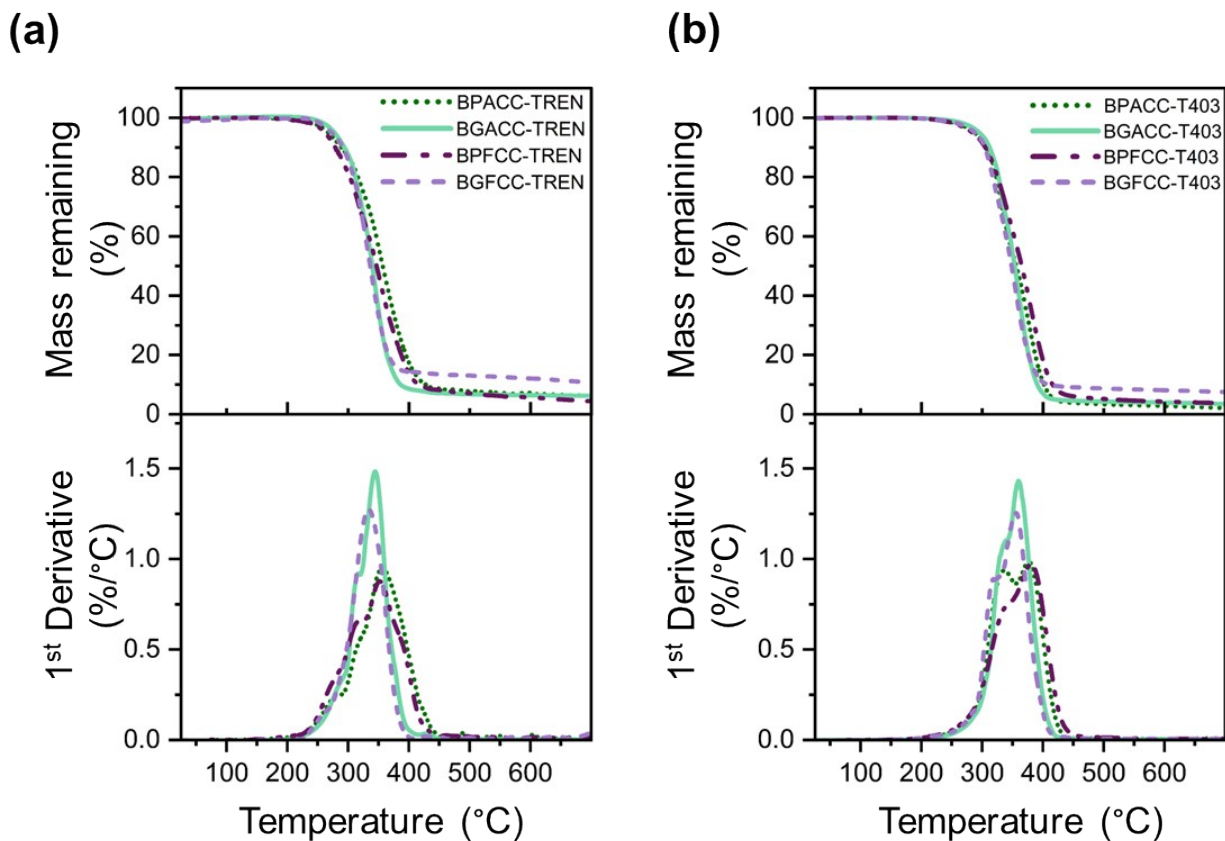

**Figure S15.** Representative thermogravimetric analysis traces and the respective first-derivative curves of sample mass remaining *versus* temperature for (a) TREN-based and (b) T403-based NIPU networks obtained at a heating rate of 10°C/min in an N<sub>2</sub> atmosphere.

**Table S2.**  $T_g$  and  $\tan \delta$  values of NIPU networks from dynamic mechanical analysis (DMA)

| Sample     | $T_g$ ( $^{\circ}\text{C}$ ) <sup>a,b</sup> | $\tan \delta$ <sup>b,c</sup> |
|------------|---------------------------------------------|------------------------------|
| BPACC-TREN | $96 \pm 2$                                  | $1.3 \pm 0.1$                |
| BGACC-TREN | $84 \pm 1$                                  | $2.3 \pm 0.1$                |
| BPFCC-TREN | $88 \pm 1$                                  | $2.2 \pm 0.1$                |
| BGFCC-TREN | $83 \pm 1$                                  | $1.9 \pm 0.2$                |
| BPACC-T403 | $55 \pm 0$                                  | $2.2 \pm 0.2$                |
| BGACC-T403 | $54 \pm 1$                                  | $2.6 \pm 0.1$                |
| BPFCC-T403 | $52 \pm 3$                                  | $2.2 \pm 0.2$                |
| BGFCC-T403 | $51 \pm 1$                                  | $2.1 \pm 0.2$                |

<sup>a</sup> $T_g$  values are the temperature of the maximum  $\tan \delta$  from the second heating trace of DMA experiments conducted in oscillatory film-tension mode at a heating rate of 3  $^{\circ}\text{C}/\text{min}$ , strain amplitude of 0.3%, frequency of 0.1 Hz, and an axial force of 0.4 N.

<sup>b</sup>The reported values are the average of three repeats with errors representing the standard deviation.

<sup>c</sup> $\tan \delta$  values are obtained from the height of the  $\tan \delta$  peaks from the second heating trace of DMA experiments.

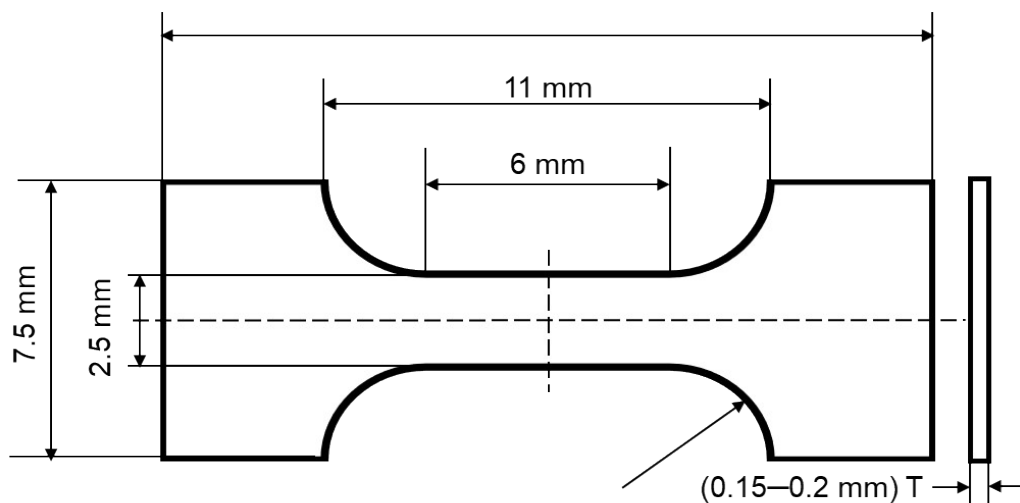

**Figure S16.** Dimensions of the NIPU networks used for tensile testing

**Table S3.** Young's modulus ( $E_o$ ) values of NIPU networks

| Sample     | $E_o$ (GPa) <sup>a,b</sup> |
|------------|----------------------------|
| BPACC-TREN | $2.0 \pm 0.3$              |
| BGACC-TREN | $2.1 \pm 1.3$              |
| BPFCC-TREN | $2.0 \pm 0.3$              |
| BGFCC-TREN | $1.7 \pm 0.3$              |
| BPACC-T403 | $2.2 \pm 0.7$              |
| BGACC-T403 | $2.2 \pm 1.3$              |
| BPFCC-T403 | $1.4 \pm 0.6$              |
| BGFCC-T403 | $1.2 \pm 0.4$              |

<sup>a</sup>Young's modulus was determined from the slope of the initial elastic region in the engineering tensile stress-strain curves. All data are based on tensile stress-strain curves obtained from the uniaxial tensile testing using a load cell of 100 N and an extension rate of 10 mm/min at ~20 °C.

<sup>b</sup>The reported values are the average of five repeats with errors representing the standard deviation.

### Water uptake studies

The equilibrium water uptake of NIPU thermoset films was estimated using an accelerated test to understand if the films had different moisture uptake, which could affect the realtive tensile properties. A representative sample of each NIPU thermoset film (~60 mg) was weighed and placed at ~20 °C in a 20-mL scintillation vial filled with 15 mL of deionized (DI) water. Next, the samples were removed from the vial after 24 h, quickly patted with KimWipe™, and weighed. The specimens were then placed back in the vials for an additional 24 h and reweighed. Those final (48 h) weights were used to determine the water uptake values in **Table S4**. The water uptake was estimated by  $(m_{\text{wet}} - m_0)/m_0$ , for which  $m_{\text{wet}}$  and  $m_0$  are the weight of the hydrated sample and the initial weight of the sample, respectively. Three repeats were performed for each sample, and the reported values are the average water uptake with errors representing the standard deviations.

**Table S4.** Water uptake values of NIPU networks

| Sample     | Water uptake (%) <sup>a</sup> |
|------------|-------------------------------|
| BPACC-TREN | 3.2 ± 0.3                     |
| BGACC-TREN | 3.1 ± 0.2                     |
| BPFCC-TREN | 2.5 ± 0.9                     |
| BGFCC-TREN | 3.1 ± 0.3                     |
| BPACC-T403 | 2.9 ± 0.7                     |
| BGACC-T403 | 3.9 ± 0.3                     |
| BPFCC-T403 | 2.8 ± 0.2                     |
| BGFCC-T403 | 5.4 ± 0.9                     |

<sup>a</sup>The reported values are the average of three repeats with errors representing the standard deviation.

**Abbreviations**

|             |                                   |
|-------------|-----------------------------------|
| BGACC       | Bisguaiacol A cyclic carbonate    |
| BGFCC       | Bisguaiacol F cyclic carbonate    |
| BPACC       | Bisphenol A cyclic carbonate      |
| BPFCC       | Bisphenol F cyclic carbonate      |
| DI          | Deionized                         |
| DMA         | Dynamic mechanical analysis       |
| DMSO- $d_6$ | Deuterated dimethyl sulfoxide     |
| DSC         | Differential scanning calorimetry |
| $E_o$       | Young's modulus                   |
| FTIR        | Fourier transform infrared        |
| NIPU        | Non-isocyanate polyurethane       |
| NMR         | Nuclear magnetic resonance        |
| T403        | Jeffamine® T-403                  |
| $T_g$       | Glass transition temperature      |
| TREN        | Tris(2-aminoethyl) amine          |
